# Supplementary material for: Photolithographically patterned and highly stable electrochromic displays enabled by a photo-assisted cross-linker
Source: Royal Society of Chemistry journal article supplement (doi:10.1039/d3tc03088a), 2023-01-01
Supplement: d3tc03088a1.pdf [file d3tc03088a1.pdf]

## Supporting Information

### **Photolithographically Patterned and Highly Stable Electrochromic Display Enabled by a Photo-assist Cross- linker**

Chenchao Huang<sup>a</sup>, Yuan-Qiu-Qiang Yi<sup>a,b,\*</sup>, Zishou Hu<sup>a</sup>, Shuo Zhang<sup>a</sup>, Xinzhou Wu<sup>a</sup>,  
Xiaolian Chen<sup>a</sup>, Wenya Xu<sup>a</sup>, Wenming Su<sup>a,\*</sup>, Zheng Cui<sup>a</sup>

<sup>a</sup>Printable Electronics Research Center, Nano-Devices and Materials Division,  
Suzhou Institute of Nano-Tech and Nano-Bionics, Chinese Academy of Sciences,  
Suzhou, Jiangsu 215123, China

<sup>b</sup> $\pi$ -Conjugated Polymers Unit, Okinawa Institute of Science and Technology, 1919-1  
Tancha, Onna-son, Kunigami-gun, Okinawa 904-0495, Japan

Corresponding author: [yqqyi2020@sinano.ac.cn](mailto:yqqyi2020@sinano.ac.cn), [wmsu2008@sinano.ac.cn](mailto:wmsu2008@sinano.ac.cn)

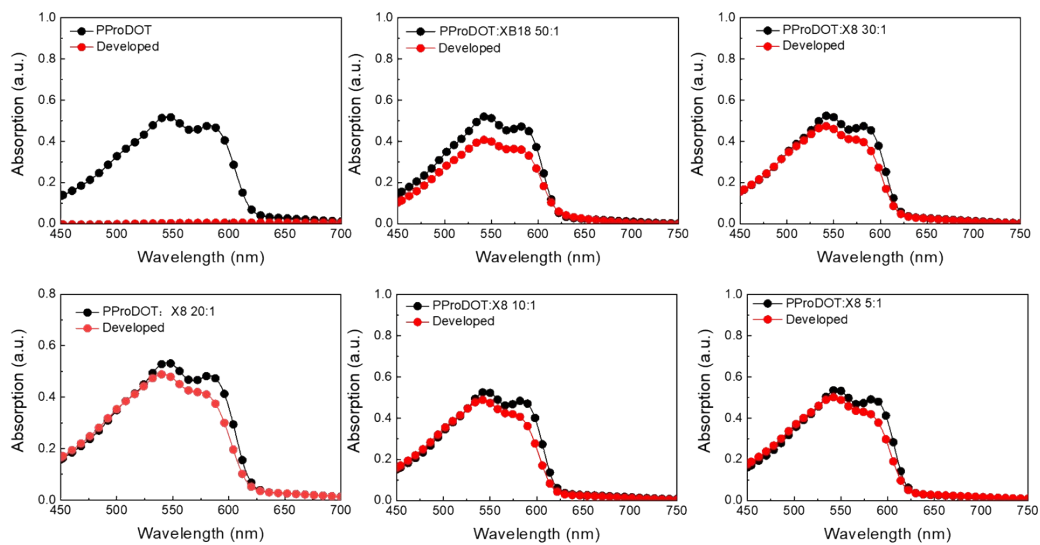

**Figure S1** The absorption intensity of UV-vis spectrum before and after dissolution with dimethylbenzene of PProDOT:X8 with different ratios.

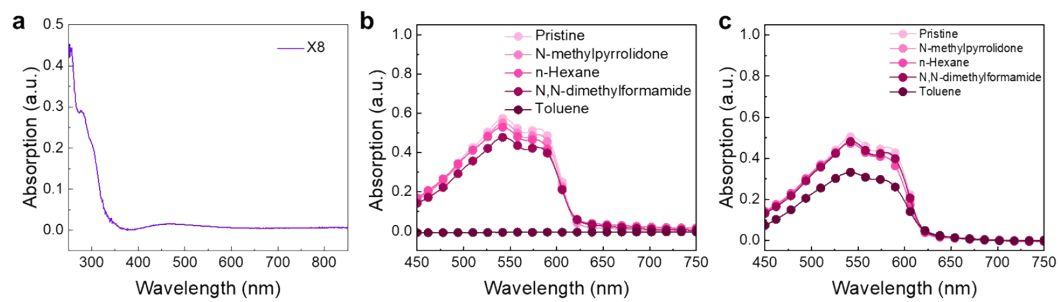

**Figure S2** (a) The absorption of X8 film, (b), (c) The absorption intensity of UV-vis spectrum of PProDOT and PProDOT:X8 (w/w = 20:1) before and after dissolution with different solvents.

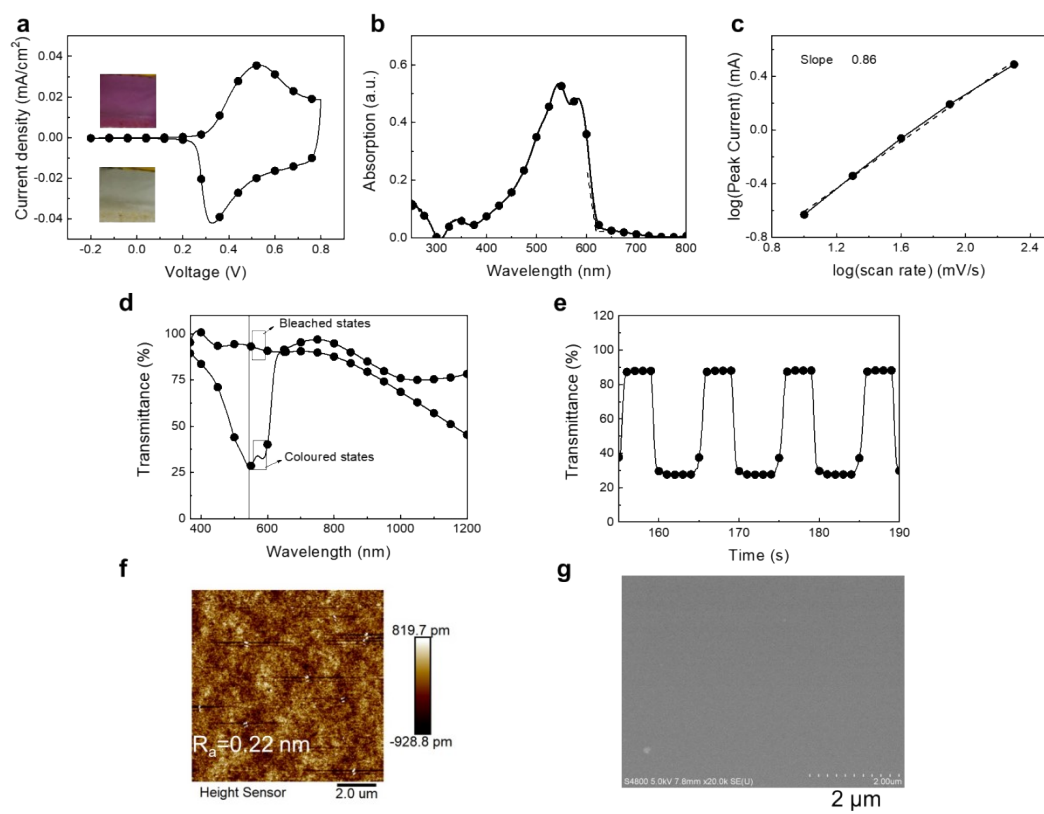

**Figure S3** (a) Cyclic voltammety analysis of crosslinked ECP films without developing (inset are digital images of the ECP films under bleached and coloured states.). (b) The absorption of the ECP Films, (c) The b-value refers to the slope of  $\log(i)$  versus  $\log(V)$  plot. (d) The transmittance of the ECPs under bleached and coloured states. (e) Switching speed measurements for a symmetrically (0.1 Hz cycle frequency, at +0.8 V and -0.6 V) driven measured at 550 nm. All reported potentials are relative to  $\text{Ag}/\text{Ag}^+$ . (f) AFM image. (g) SEM image.

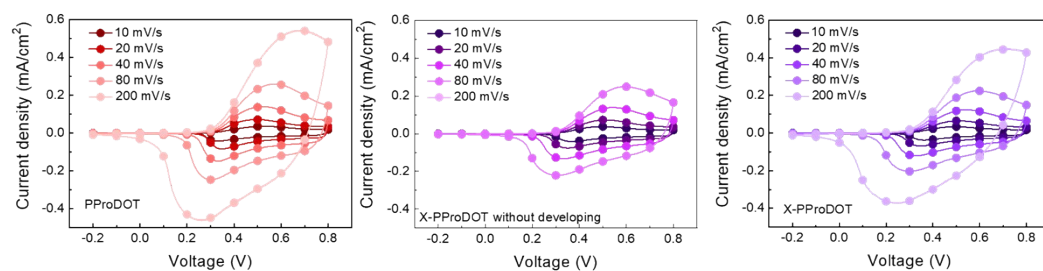

**Figure S4** Cyclic voltammetry analysis of ECP films (PProDOT, X-PProDOT without developing, X-PProDOT) under different scan rates.

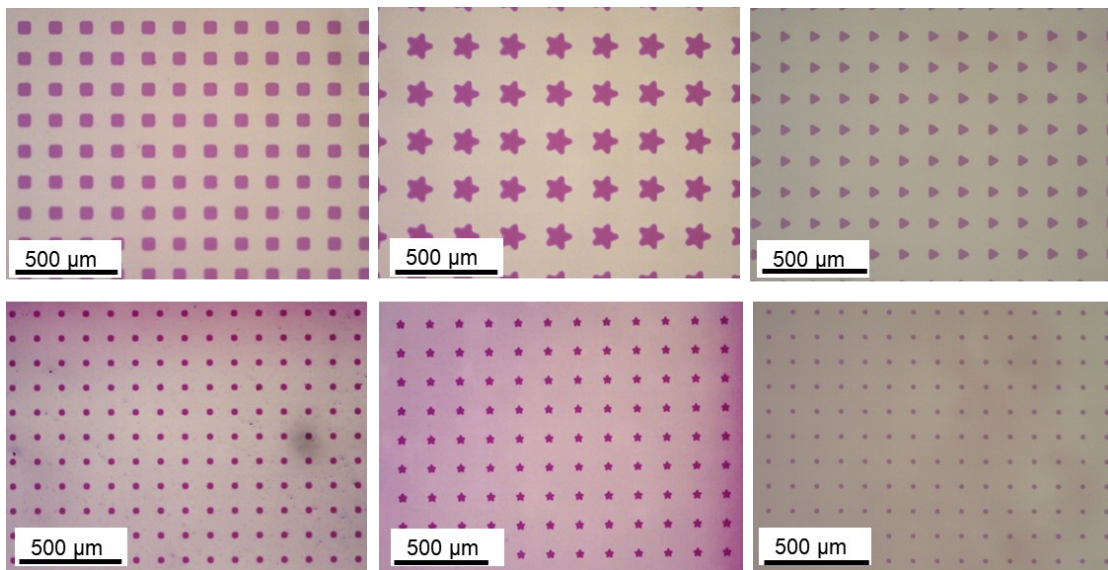

**Figure S5** 3D Digital microscope images of the patterned thin films of X-PProDOT.

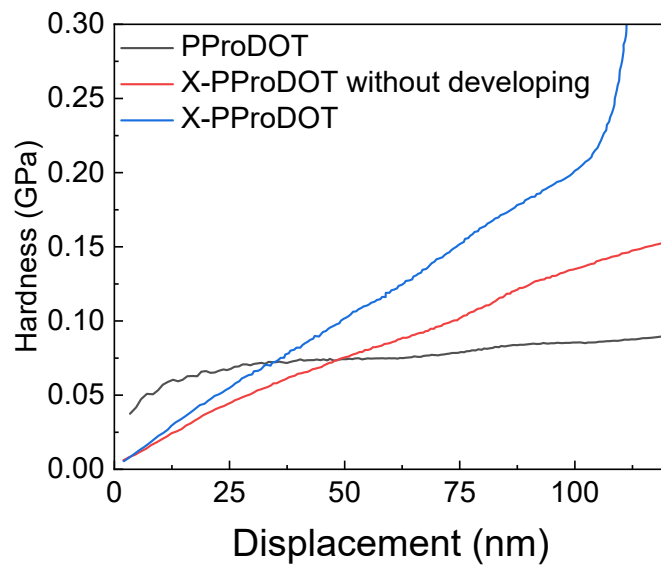

**Figure S6** Indentation-depth dependence of the hardness

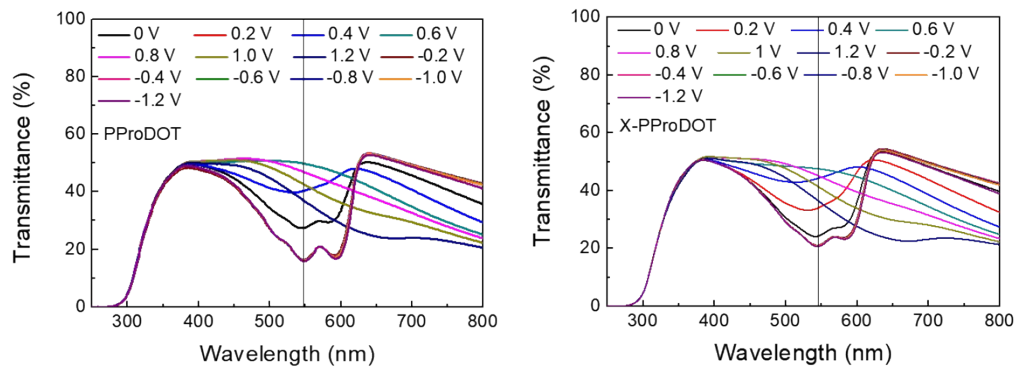

**Figure S7** The transmittance change of PProDOT/X-PProDOT devices vs. Optical wavelength from -1.2 V to 1.2 V



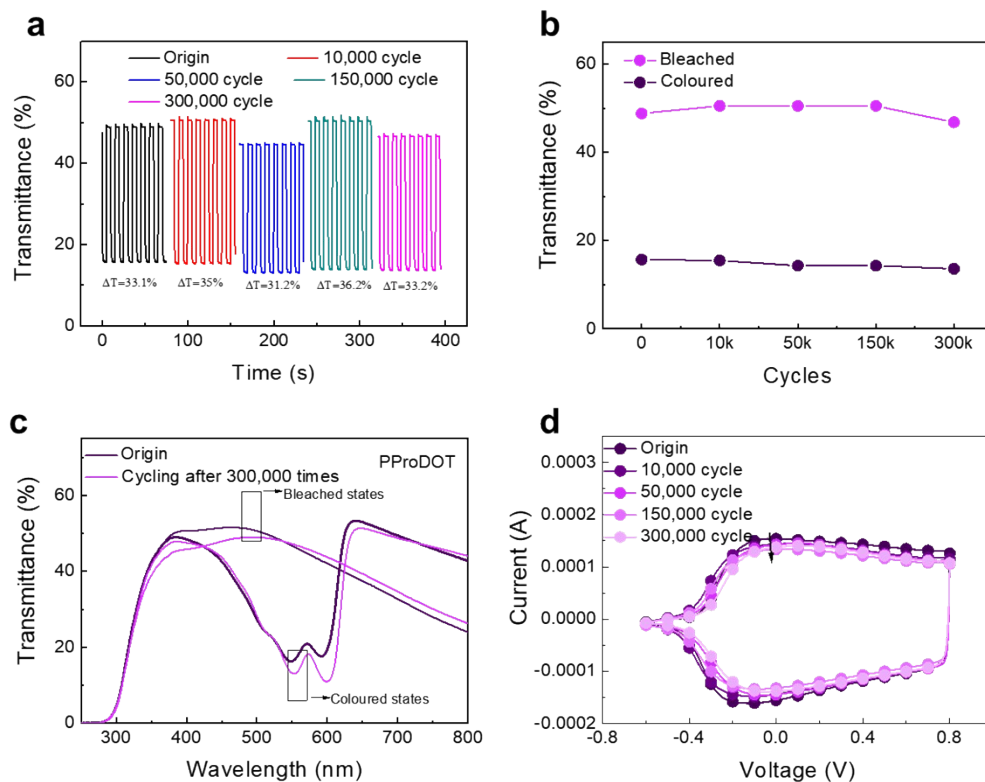

**Figure S8** (a) switching speed measurements measured at 550 nm. (b), (c) the transmittance change modulation. (d) changes of CV curves during 300,000 operating cycles of the device based on PProDOT for a driven symmetrically (0.1 Hz cycle frequency, at +0.8 V and -0.6 V).

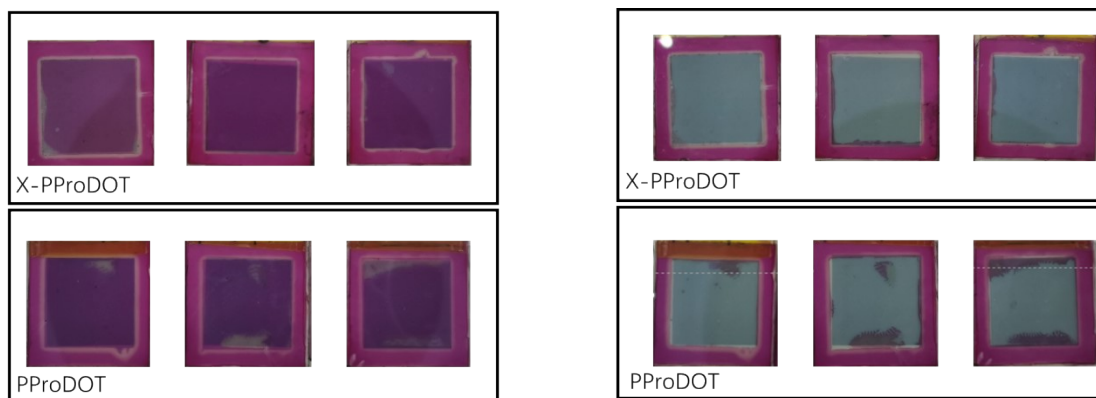

**Figure S9** Bleached (left) and coloured (right) states of X-PProDOT/PProDOT devices after ~300,000 cycles with a 0.25 Hz cycle frequency, at +0.8 V and -0.6 V.

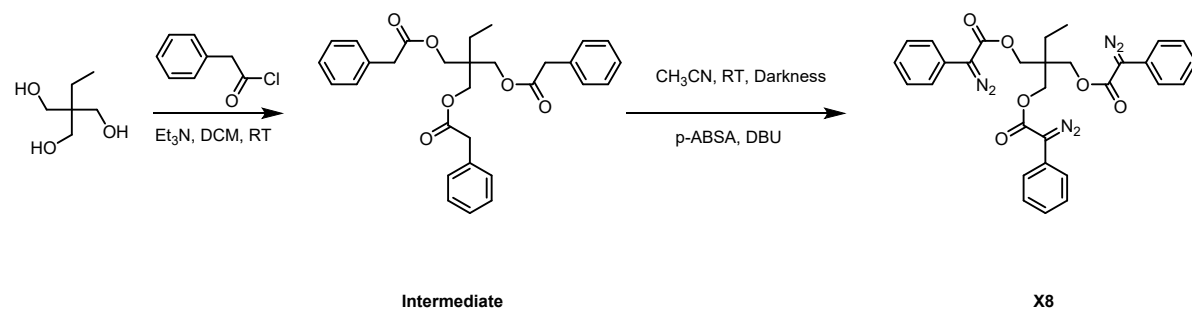

**Scheme S1** Synthetic procedures for X8

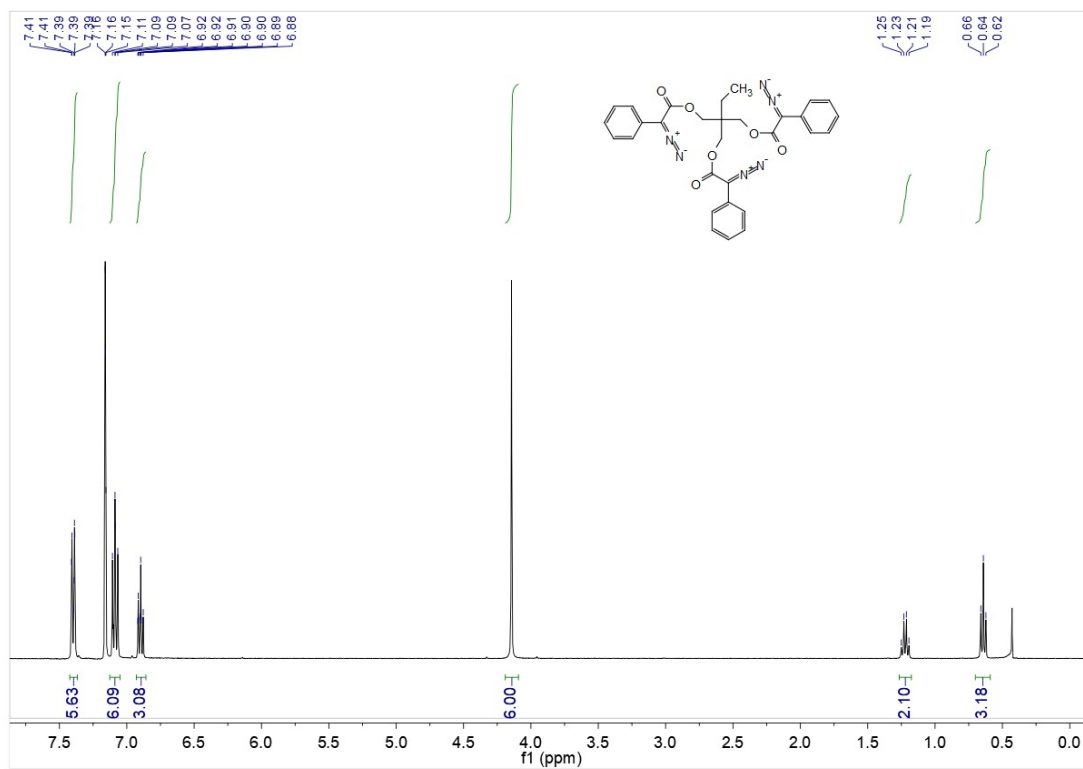

$^1\text{H}$  NMR of X8

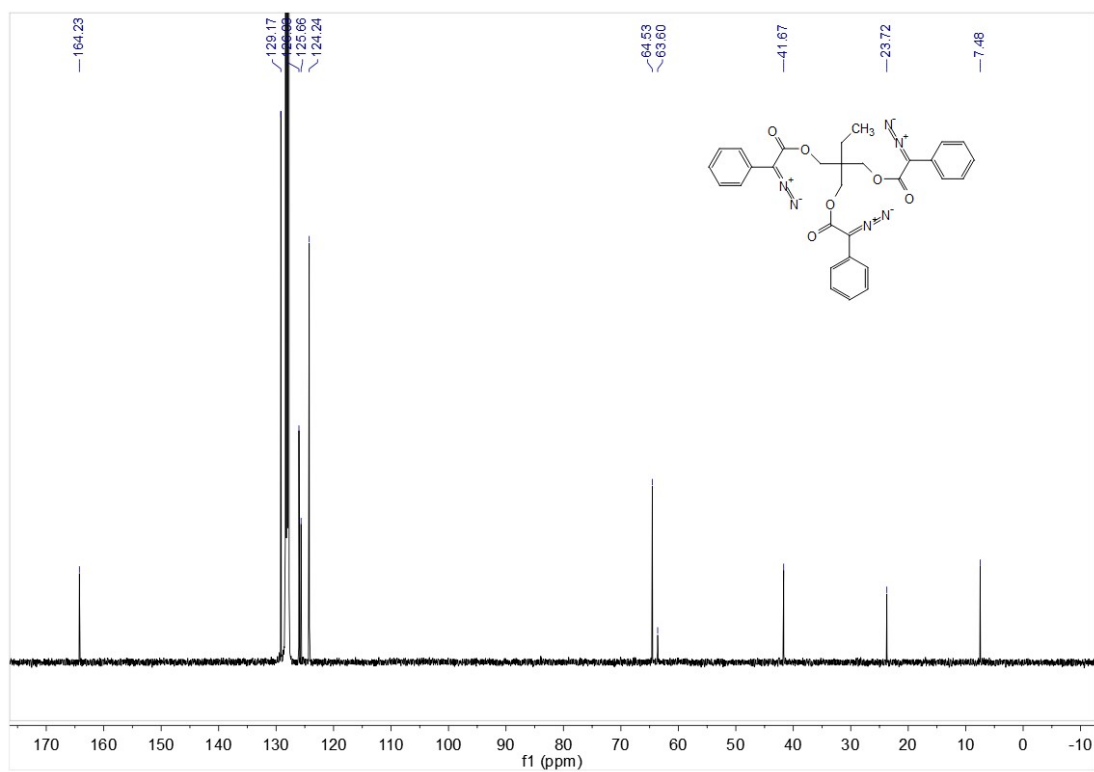

$^{13}\text{C}$  NMR of X8

**Table S1.** UV-vis absorbance of PProDOT:X8 film with different ratios before and after rinsing with xylene.

| <b>Film</b> | <b>Before rinsing(a.u.)</b> | <b>After Rinsing (a.u.)</b> | <b>Anti-solution(%)</b> |
|-------------|-----------------------------|-----------------------------|-------------------------|
| PProDOT     | 0.52                        | 0                           | 0                       |
| 50: 1       | 0.52                        | 0.40                        | 76.9                    |
| 30: 1       | 0.53                        | 0.47                        | 88.7                    |
| 20: 1       | 0.53                        | 0.49                        | 92.5                    |
| 10: 1       | 0.53                        | 0.49                        | 92.5                    |
| 5: 1        | 0.54                        | 0.49                        | 90.7                    |

**Table S2.** Solvent resistance of PProDOT and PProDOT:X8 film ( w/w = 20:1).

|                              | <b>PProDOT</b> | <b>PProDOT:X8(20:1)</b> |
|------------------------------|----------------|-------------------------|
| <b>N-methylpyrrolidone</b>   | 95.8%          | 95.3%                   |
| <b>n-Hexane</b>              | 91.8%          | 93.2%                   |
| <b>N,N-dimethylformamide</b> | 83.3%          | 95.2%                   |
| <b>Toluene</b>               | 0%             | 65.5%                   |
| <b>xylene</b>                | 0%             | 92.5%                   |

**Table S3** Summary of characters of the X-PProDOT(without developing).

|                                   | $E_{\text{onset}}$<br>$t$<br>(V) <sup>a</sup> | $\lambda_{\text{onset}}$<br>(nm)<br>a | $\lambda_{\text{max}}$<br>(nm)<br>a | $E_{\text{g}}$<br>(eV)<br>b | HOMO<br>(eV) <sup>c</sup> | LUMO<br>(eV) <sup>d</sup> | $T_{\text{min}}$<br>(%) | $T_{\text{max}}$<br>x<br>(%) | $\Delta T$<br>(%) | $t_{\text{b}}$<br>(s)<br>h | $t_{\text{c}}$<br>(s) <sup>i</sup> |
|-----------------------------------|-----------------------------------------------|---------------------------------------|-------------------------------------|-----------------------------|---------------------------|---------------------------|-------------------------|------------------------------|-------------------|----------------------------|------------------------------------|
| X-PProDOT<br>(Without developing) | 0.30                                          | 620                                   | 545                                 | 2.0                         | -4.90                     | -2.90                     | 27.8                    | 88                           | 60.2              | 1.3                        | 0.7                                |

a Obtained from CV curve, b obtained from UV-vis spectrum, c  $E_{\text{g}}=1240/\lambda_{\text{onset}}$ , d obtained from CV curve of its film in 1 M LiClO<sub>4</sub> in PC solution,  $E_{\text{HOMO}}=-(E_{\text{onset}}+4.6)$ , e  $E_{\text{LUMO}}=E_{\text{g}}+E_{\text{HOMO}}$ , g  $\Delta T$  is calculated by  $T_{\text{max}}-T_{\text{min}}$ , h, I obtained from the electrochromic switching by 90% $\Delta T$ .

**Table S4** Perfomance summary of PProDOT device

| Cycles  | $V_{\text{bleaching}}$<br>V | $V_{\text{Colouring}}$<br>V | $T_{\text{bleaching}}$<br>% | $T_{\text{colouring}}$<br>% | $\Delta T$<br>% | $t_{\text{bleaching}}$<br>s | $t_{\text{Colouring}}$<br>s |
|---------|-----------------------------|-----------------------------|-----------------------------|-----------------------------|-----------------|-----------------------------|-----------------------------|
| 0       | 0.8                         | -0.6                        | 48.8                        | 15.7                        | 33.1            | 0.4                         | 0.7                         |
| 10,000  | 0.8                         | -0.6                        | 50.5                        | 15.5                        | 35              | 0.5                         | 0.5                         |
| 50,000  | 0.8                         | -0.6                        | 50.5                        | 14.3                        | 36.2            | 0.6                         | 0.8                         |
| 150,000 | 0.8                         | -0.6                        | 50.5                        | 14.3                        | 36.2            | 0.6                         | 0.8                         |
| 300,000 | 0.8                         | -0.6                        | 46.8                        | 13.6                        | 33.2            | 0.4                         | 0.8                         |

**Table S5** Performance summary of X-PProDOT device

| <b>Cycles</b> | $V_{\text{bleaching}}$ | $V_{\text{Colouring}}$ | $T_{\text{bleaching}}$ | $T_{\text{colouring}}$ | $\Delta T$ | $t_{\text{bleaching}}$ | $t_{\text{Colouring}}$ |
|---------------|------------------------|------------------------|------------------------|------------------------|------------|------------------------|------------------------|
|               | <b>V</b>               | <b>V</b>               | <b>%</b>               | <b>%</b>               | <b>%</b>   | <b>s</b>               | <b>s</b>               |
| 0             | 0.8                    | -0.6                   | 48.9                   | 20.9                   | 28         | 0.5                    | 0.5                    |
| 10,000        | 0.8                    | -0.6                   | 53                     | 19.8                   | 34.2       | 0.5                    | 0.7                    |
| 50,000        | 0.8                    | -0.6                   | 50.3                   | 20.1                   | 30.2       | 0.5                    | 0.8                    |
| 150,000       | 0.8                    | -0.6                   | 50.3                   | 20.1                   | 30.2       | 0.5                    | 0.8                    |
| 300,000       | 0.8                    | -0.6                   | 50.7                   | 20.3                   | 30.4       | 0.5                    | 0.9                    |
